# Supplementary material for: Multicolour and up-conversion fluorescence of lanthanide doped Vernier phase yttrium oxyfluoride nanocrystals
Source: Royal Society of Chemistry journal article supplement (doi:10.1039/c3tc00642e), 2013-01-01

## Supporting information

### Multicolour and up-conversion fluorescence of lanthanide doped Vernier phase yttrium oxyfluoride nanocrystals

Ting Wen,<sup>a</sup> Wenjiao Luo,<sup>b, c</sup> Yonggang Wang,<sup>\*b</sup> Miao Zhang,<sup>a</sup> Yanzhen Guo,<sup>a</sup> Jinyun Yuan,<sup>a</sup> Jing Ju,<sup>b</sup> Yingxia Wang,<sup>\*b</sup> Fuhui Liao<sup>b</sup> and Baocheng Yang<sup>\*a</sup>

<sup>a</sup> Institute of Nanostructured Functional Materials, Huanghe Science and Technology College, Zhengzhou, Henan, 450006, China  
Fax: +86-10-62753541; Tel: 86-10-62754186; E-mail: yxwang@pku.edu.cn.

<sup>b</sup> Beijing National Laboratory for Molecular Sciences, State Key Laboratory for Rare Earth Materials Chemistry and Applications, College of Chemistry and Molecular Engineering, Peking University, Beijing, 100871, China

<sup>c</sup> School of Materials Sciences and Technology, China University of Geosciences, Beijing, 100190, China

**Fig. S1** Reitveld refinement plots of undoped V-YOF and Ln<sup>3+</sup> doped V-YOF samples based on the PXRD patterns.

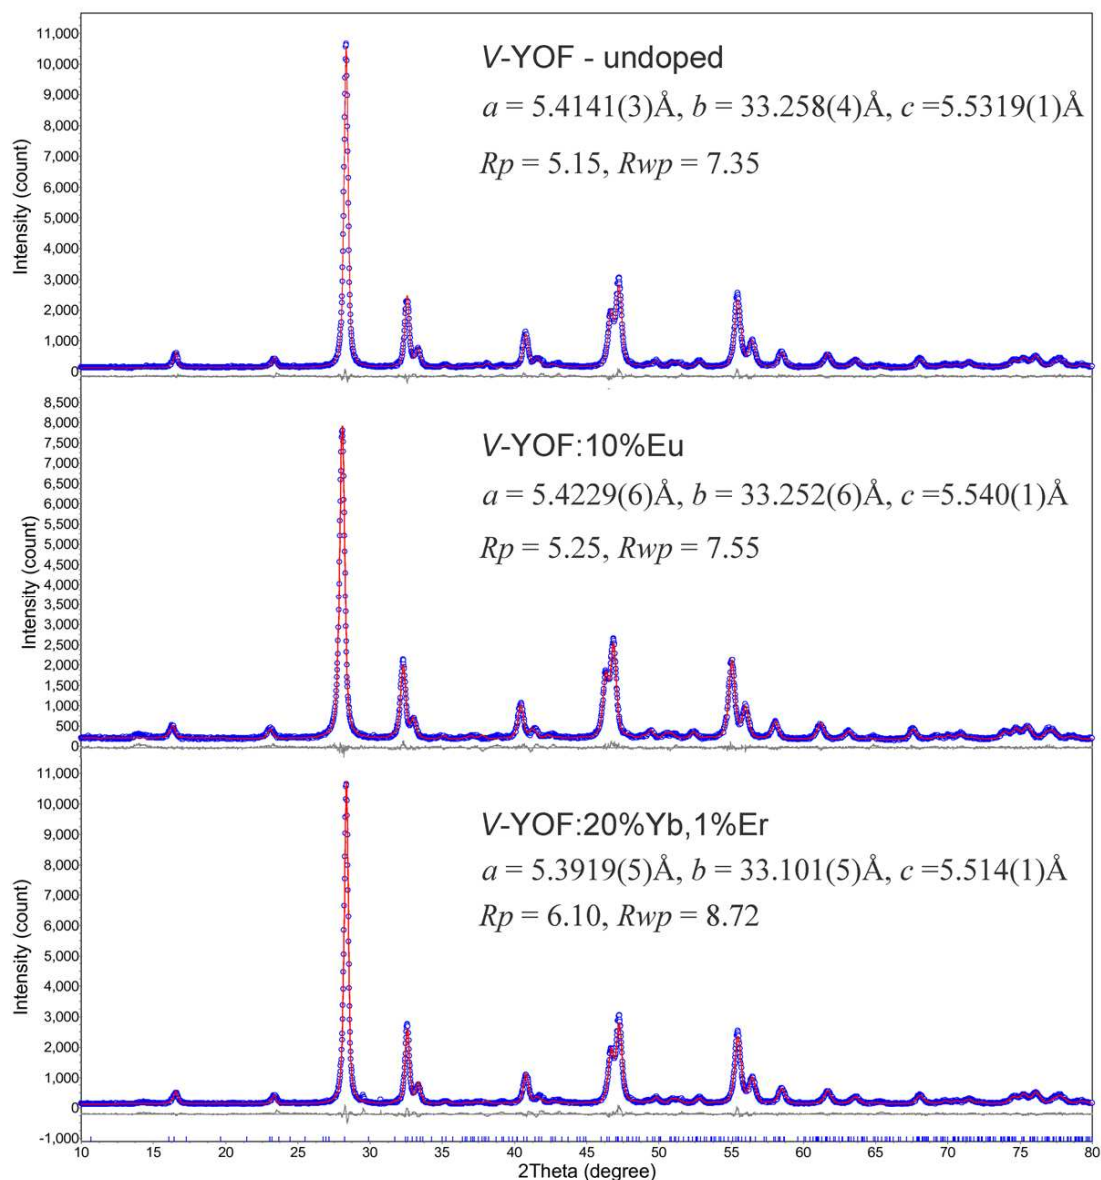

**Fig. S3** HRTEM images of *V*-YOF samples annealed at 400 °C.

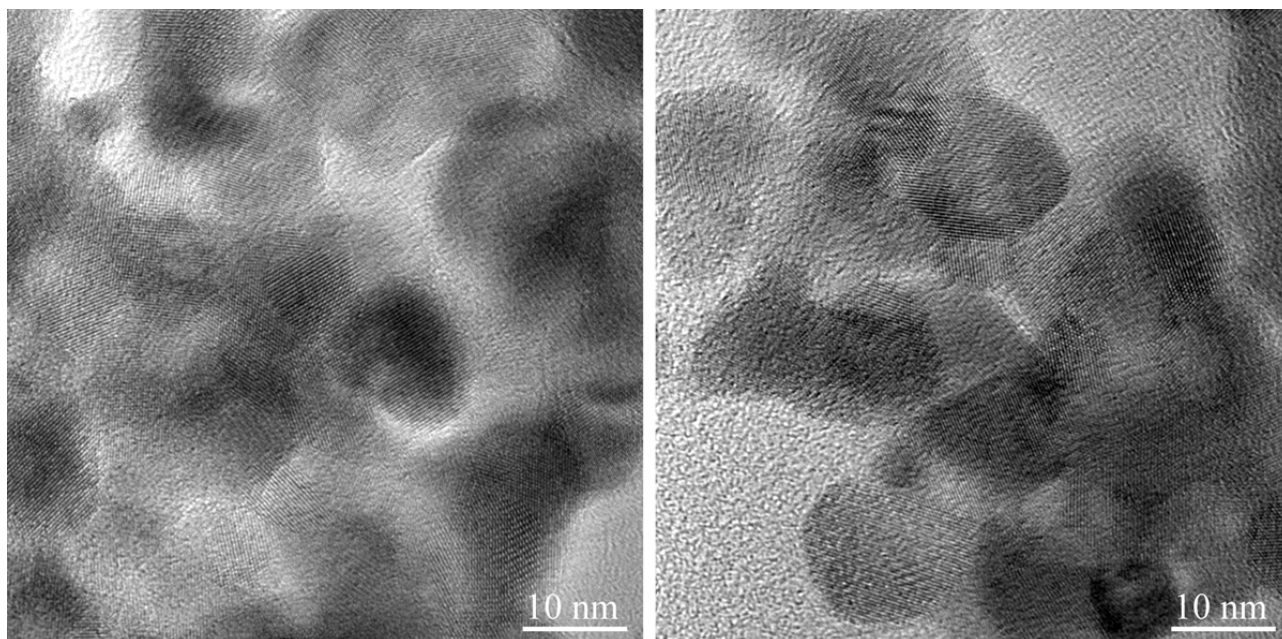

**Fig. S3** TEM images of a) the precursor by coprecipitation and *V*-YOF samples annealed at different temperatures: b) 400 °C, c) 600 °C.

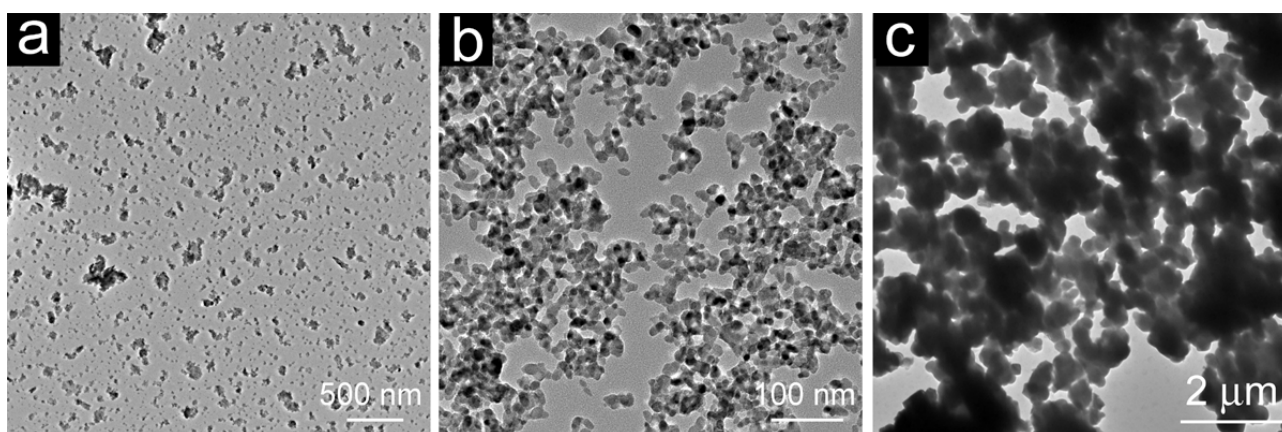

**Fig. S4** Elemental distribution of YOF:20%Yb,1%Ho.

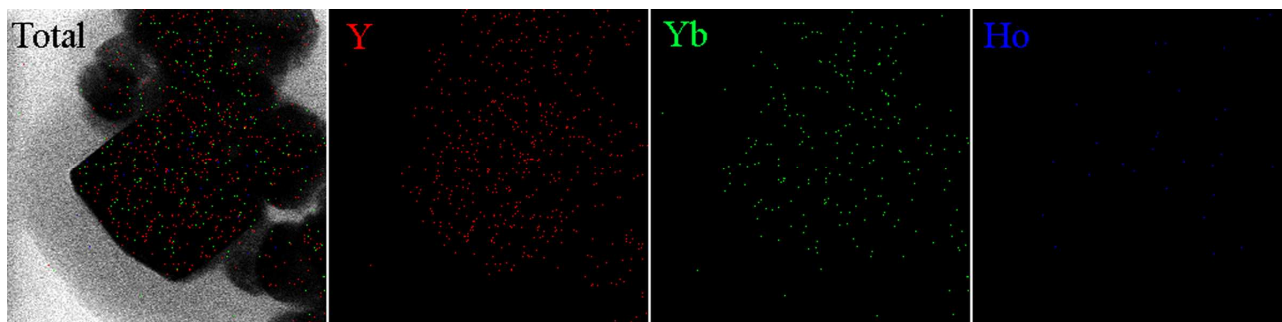

Supplement: c3tc00642e.pdf [file c3tc00642e.pdf]
